# Supplementary material for: Endocytosis and lysosomal degradation of GluA2/3 AMPARs in response to oxygen/glucose deprivation in hippocampal but not cortical neurons
Source: PubMed Central journal article supplement (PMC5614987; doi:10.1038/s41598-017-12534-w), 2017-09-26
Supplement: 41598_2017_12534_MOESM1_ESM.pdf [file 41598_2017_12534_MOESM1_ESM.pdf]

# Endocytosis and lysosomal degradation of GluA2/3 AMPARs in response to oxygen/glucose deprivation in hippocampal but not cortical neurons

Zsombor Koszegi, Maria Fiuza, Jonathan G Hanley

## Supplementary Figure S1

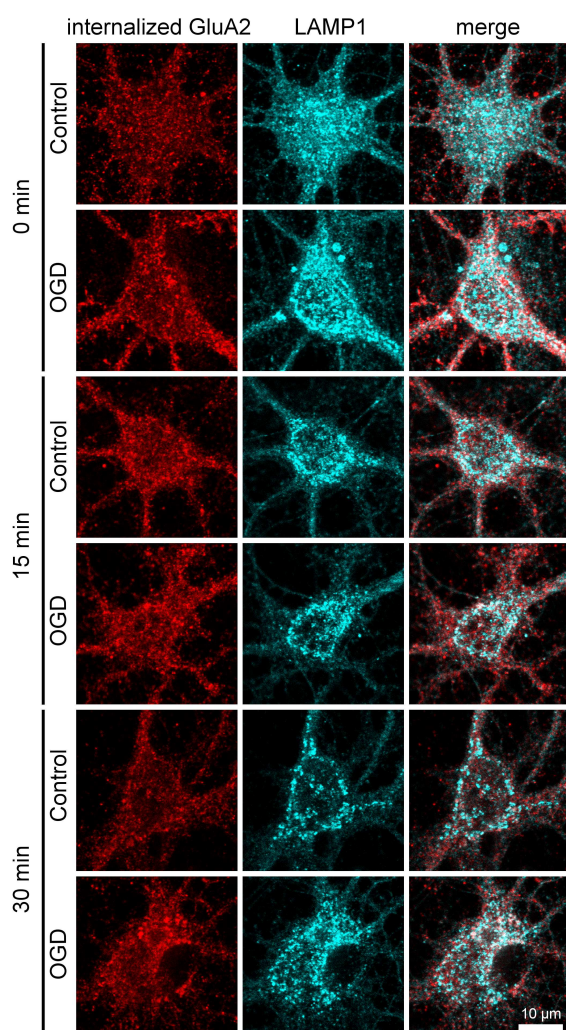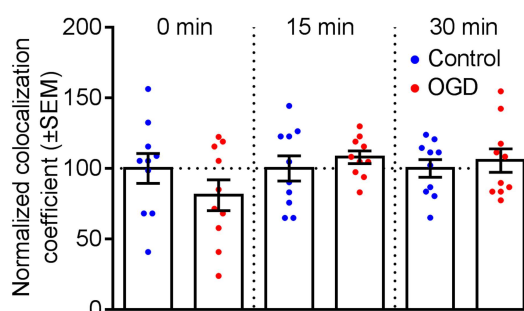

Internalized endogenous GluA2 is not targeted to lysosomes in hippocampal neuronal cell bodies after OGD/reperfusion.

Neurons were live-labeled with anti-GluA2 antibodies prior to 20 min OGD and 0, 15, 30 min reperfusion. After fixation, internalized GluA2 was labeled with red secondary antibodies, and neurons were also immunostained for the lysosomal marker LAMP1 (cyan). Representative confocal images are shown. Pearson's coefficient of colocalization between internalized GluA2 and the lysosomal marker LAMP1 was determined. Two-tailed Student's t-test.

## Supplementary Figure S2

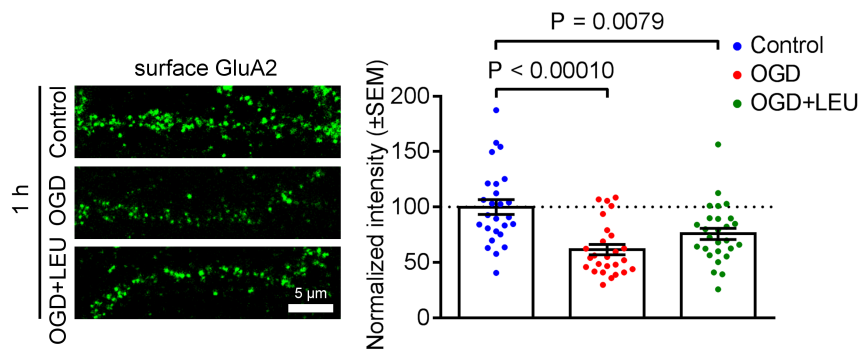

The loss of surface GluA2 caused by OGD is unaffected by leupeptin treatment.

Neurons were treated with leupeptin for 3 hours then live-labeled with anti-GluA2 antibodies prior to 20 min OGD and 1 h reperfusion. After fixation, surface GluA2 was labeled with green antibodies. Representative confocal images are shown. One-way ANOVA followed by Tukey's test.



## Supplementary Figure S4

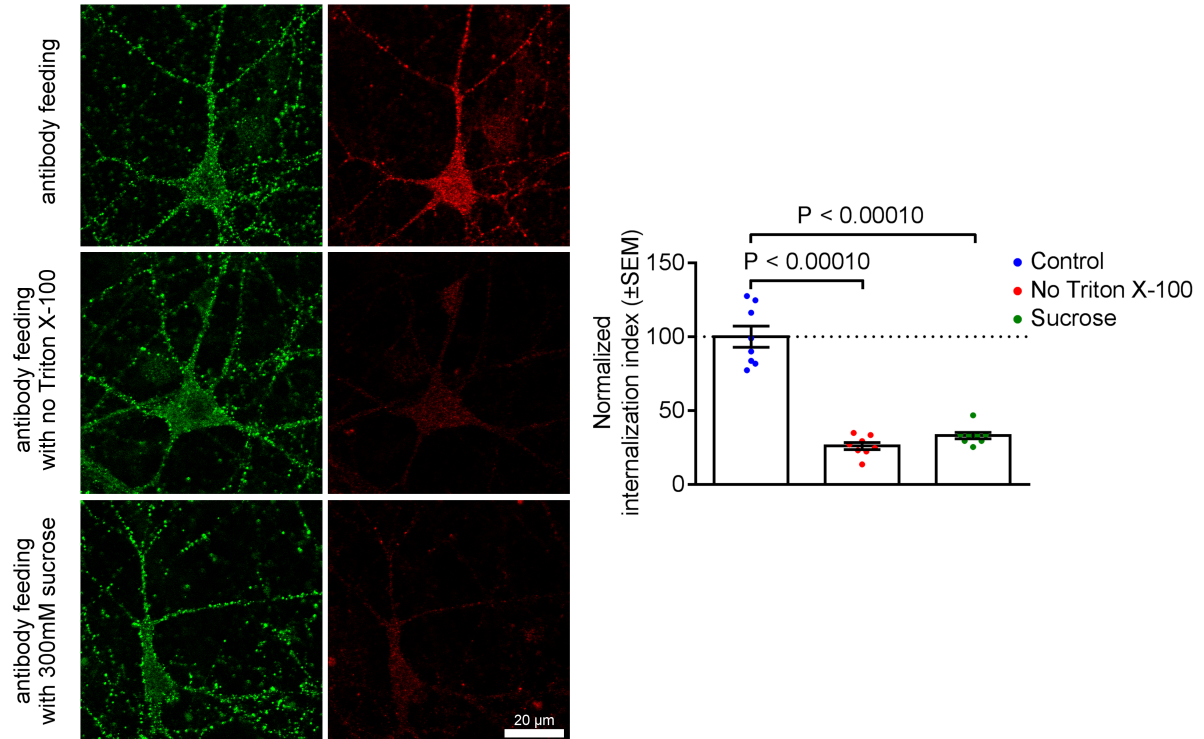

Negative controls demonstrate the selective labeling of internalized GluA2 receptors.

Internalization index was calculated following GluA2 antibody feeding. Omitting a permeabilization step (no Triton X-100) results in a significant decrease in the internalized GluA2 intensity. Similarly, blocking endocytosis with 300mM sucrose results in a significant decrease in the internalized GluA2 intensity. One-way ANOVA followed by Tukey's test.

## Supplementary Figure S5

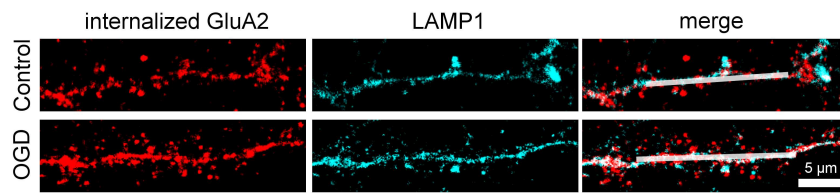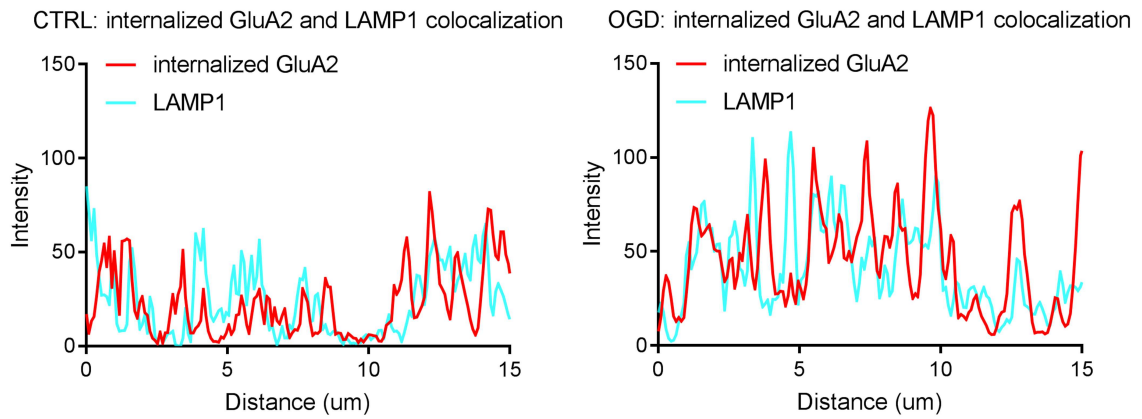

Internalized endogenous GluA2 colocalizes with LAMP1 following OGD/reperfusion in hippocampal neurons.

Line scans indicate the level of colocalization after 20 min of OGD (or control), followed by 30 min of reperfusion.

Supplementary Table S1

|                  |         | mean   | SD     |
|------------------|---------|--------|--------|
| <b>Figure 2a</b> |         |        |        |
| 0 min            | CTRL    | 0.3942 | 0.0843 |
|                  | OGD     | 0.3943 | 0.0920 |
| 15 min           | CTRL    | 0.3921 | 0.0869 |
|                  | OGD     | 0.4264 | 0.0952 |
| 30 min           | CTRL    | 0.4471 | 0.0387 |
|                  | OGD     | 0.4975 | 0.0864 |
| <b>Figure 2b</b> |         |        |        |
| 1 h              | CTRL    | 0.3035 | 0.0452 |
|                  | OGD     | 0.3375 | 0.0918 |
|                  | OGD+LEU | 0.3771 | 0.0837 |
| <b>Figure 2e</b> |         |        |        |
| Rab5             |         |        |        |
| 15 min           | CTRL    | 0.1865 | 0.0508 |
|                  | OGD     | 0.2253 | 0.0371 |
| Rab11            |         |        |        |
| 15 min           | CTRL    | 0.3156 | 0.0549 |
|                  | OGD     | 0.3141 | 0.0549 |
| <b>Figure 3c</b> |         |        |        |
| SVKE             |         |        |        |
| 15 min           | CTRL    | 0.1489 | 0.0694 |
|                  | OGD     | 0.1947 | 0.0885 |
| EVKI             |         |        |        |
| 15 min           | CTRL    | 0.1728 | 0.0870 |
|                  | OGD     | 0.1891 | 0.0772 |
| <b>Figure 5d</b> |         |        |        |
| 30 min           | CTRL    | 0.1455 | 0.0425 |
|                  | OGD     | 0.1746 | 0.0381 |

Table showing the raw values for Pearson's coefficient of colocalization.
